# Supplementary material for: Proteome Profiling of the Exhaled Breath Condensate after Long-Term Spaceflights
Source: Int J Mol Sci. 2019 Sep 12;20(18):4518. doi: 10.3390/ijms20184518 (PMC6770753; doi:10.3390/ijms20184518)
Supplement: Supplementary file 1 [file ijms-20-04518-s001.xlsx]

## Sheet: R0 group
1	Peptides	Unique peptides	Sequence coverage [%]	Score	Intensity	MS/MS count	Majority protein IDs	Protein names	Gene names
10.5654	1	1	1.9	5.478	4641.9	1	Q9UJ96	Potassium voltage-gated channel subfamily G member 2	KCNG2
13.2375	5	5	41.8	52.215	243890	9	Q9NZT1	Calmodulin-like protein 5	CALML5
9.56112	1	1	3.9	5.8165	9389.8	1	Q9H081	Protein MIS12 homolog	MIS12
8.59227	1	1	1.9	7.2451	12417	2	Q8WVV4	Protein POF1B	POF1B
12.8916	1	1	1.8	5.8645	97418	1	Q8NEF3	Coiled-coil domain-containing protein 112	CCDC112
12.5962	1	1	1.1	5.965	18969	1	Q7Z5L2	Coiled-coil domain-containing protein R3HCC1L	R3HCC1L
9.07711	1	1	4.4	9.9985	16032	2	Q6ZVX7	F-box only protein 50	NCCRP1
10.4994	1	1	1.3	6.2192	36833	2	Q6P2P2	Putative protein arginine N-methyltransferase 9	PRMT9
10.6667	1	1	2.6	5.7885	6668.2	1	Q14954;Q14952	Killer cell immunoglobulin-like receptor 2DS1;Killer cell immunoglobulin-like receptor 2DS3	KIR2DS1;KIR2DS3
8.86338	1	1	1.5	5.8671	9897.8	2	Q13835	Plakophilin-1	PKP1
10.1854	1	1	0.5	7.4039	14474	1	Q12873	Chromodomain-helicase-DNA-binding protein 3	CHD3
11.0999	3	3	8.1	45.613	56505	5	Q08188	Protein-glutamine gamma-glutamyltransferase E;Protein-glutamine gamma-glutamyltransferase E 50 kDa catalytic chain;Protein-glutamine gamma-glutamyltransferase E 27 kDa non-catalytic chain	TGM3
10.6419	3	3	4.4	28.87	30903	5	Q02413	Desmoglein-1	DSG1
7.98014	1	1	3	5.4746	3138.5	1	Q02241	Kinesin-like protein KIF23	KIF23
13.694	1	1	1	6.0471	84187	2	Q01968	Inositol polyphosphate 5-phosphatase OCRL-1	OCRL
9.96867	2	2	13.3	12.893	12845	2	Q01469	Fatty acid-binding protein, epidermal	FABP5
9.84229	1	1	8.1	5.668	27544	2	Q71DI3;Q16695;P84243;P68431	Histone H3.2;Histone H3.1t;Histone H3.3;Histone H3.1	HIST2H3A;HIST3H3;H3F3A;HIST1H3A
8.26261	2	1	7.4	7.5479	3817.4	1	P68366	Tubulin alpha-4A chain	TUBA4A
11.4626	2	1	7.3	24.074	52535	3	Q9BQE3;Q71U36;P68363;Q9NY65;Q6PEY2;Q13748	Tubulin alpha-1C chain;Tubulin alpha-1A chain;Tubulin alpha-1B chain;Tubulin alpha-8 chain;Tubulin alpha-3E chain;Tubulin alpha-3C/D chain	TUBA1C;TUBA1A;TUBA1B;TUBA8;TUBA3E;TUBA3C
11.0238	2	2	4.5	11.286	25880	2	Q5VTE0;P68104;Q05639	Putative elongation factor 1-alpha-like 3;Elongation factor 1-alpha 1;Elongation factor 1-alpha 2	EEF1A1P5;EEF1A1;EEF1A2
9.16252	1	1	3.7	6.4433	16309	2	P63104	14-3-3 protein zeta/delta	YWHAZ
8.99251	1	1	10.9	7.3011	6529.8	1	P62937	Peptidyl-prolyl cis-trans isomerase A;Peptidyl-prolyl cis-trans isomerase A, N-terminally processed	PPIA
12.4067	4	4	40.8	45.244	137140	7	P62805	Histone H4	HIST1H4A
14.096	7	7	26.7	117.7	455800	13	P63261;P60709;P63267;P68133;P68032;P62736	Actin, cytoplasmic 2;Actin, cytoplasmic 2, N-terminally processed;Actin, cytoplasmic 1;Actin, cytoplasmic 1, N-terminally processed;Actin, gamma-enteric smooth muscle;Actin, alpha skeletal muscle;Actin, alpha cardiac muscle 1;Actin, aortic smooth muscle	ACTG1;ACTB;ACTG2;ACTA1;ACTC1;ACTA2
11.7732	4	3	5.6	47.223	69649	4	P58107;Q15149	Epiplakin;Plectin	EPPK1;PLEC
12.2546	7	3	21.5	64.346	123740	10	P48594	Serpin B4	SERPINB4
13.6414	3	3	30.1	53.096	326600	7	P47929	Galectin-7	LGALS7
12.0558	1	1	4.3	8.0072	22500	3	P35030	Trypsin-3	PRSS3
9.94771	1	1	5.6	10.636	35931	2	P32119;Q06830	Peroxiredoxin-2;Peroxiredoxin-1	PRDX2;PRDX1
11.7182	5	5	13.7	34.104	85094	7	P31947	14-3-3 protein sigma	SFN
11.3795	3	3	14	30.996	56634	5	P31944	Caspase-14;Caspase-14 subunit p17, mature form;Caspase-14 subunit p10, mature form;Caspase-14 subunit p20, intermediate form;Caspase-14 subunit p8, intermediate form	CASP14
9.25236	6	2	19.2	43.227	7818.3	2	P29508	Serpin B3	SERPINB3
8.80394	1	1	8.1	6.7375	5555.4	1	P27482	Calmodulin-like protein 3	CALML3
9.03521	1	1	2	7.5133	11032	2	P22735	Protein-glutamine gamma-glutamyltransferase K	TGM1
8.05648	1	1	5.3	5.5567	3309.1	1	Q9NRW1;P20340;Q14964	Ras-related protein Rab-6B;Ras-related protein Rab-6A;Ras-related protein Rab-39A	RAB6B;RAB6A;RAB39A
8.18274	2	1	5	10.011	3611.8	1	P19971	Thymidine phosphorylase	TYMP
8.19436	1	1	8.5	11.326	3755.2	1	P18510	Interleukin-1 receptor antagonist protein	IL1RN
11.2348	3	3	6.2	32.629	47292	4	P17066;P48741;P0DMV9;P0DMV8	Heat shock 70 kDa protein 6;Putative heat shock 70 kDa protein 7;Heat shock 70 kDa protein 1B;Heat shock 70 kDa protein 1A	HSPA6;HSPA7;HSPA1B;HSPA1A
8.30264	1	1	7.1	6.2351	4047.9	1	P16401	Histone H1.5	HIST1H1B
13.7598	21	21	8.4	197.92	351130	31	P15924	Desmoplakin	DSP
12.798	7	7	12.8	74.558	180570	13	P14923	Junction plakoglobin	JUP
8.10318	1	1	1.1	6.3469	3525.1	1	P14735	Insulin-degrading enzyme	IDE
10.9201	4	4	13	31.87	30184	4	P14618	Pyruvate kinase PKM	PKM
12.8245	3	3	26.6	41.147	145450	6	P62987;P62979;P0CG47;P0CG48	Ubiquitin-60S ribosomal protein L40;Ubiquitin;60S ribosomal protein L40;Ubiquitin-40S ribosomal protein S27a;Ubiquitin;40S ribosomal protein S27a;Polyubiquitin-B;Ubiquitin;Polyubiquitin-C;Ubiquitin	UBA52;RPS27A;UBB;UBC
6.90881	4	2	8.6	11.303	3599.2	2	P08670	Vimentin	VIM
10.1385	1	1	1.9	16.784	27732	2	P08238;P07900	Heat shock protein HSP 90-beta;Heat shock protein HSP 90-alpha	HSP90AB1;HSP90AA1
9.85117	1	1	3.4	8.6083	11841	1	P07437;Q9BVA1;Q13885;Q13509	Tubulin beta chain;Tubulin beta-2B chain;Tubulin beta-2A chain;Tubulin beta-3 chain	TUBB;TUBB2B;TUBB2A;TUBB3
11.3427	5	4	16.5	32.277	41275	5	P07355;A6NMY6	Annexin A2;Putative annexin A2-like protein	ANXA2;ANXA2P2
11.8025	3	3	11.3	29.372	90320	6	P06733	Alpha-enolase	ENO1
11.9169	2	2	24.6	39.373	92032	3	P06702	Protein S100-A9	S100A9
9.52918	1	1	11.8	6.506	19648	2	P05109	Protein S100-A8;Protein S100-A8, N-terminally processed	S100A8
9.63719	1	1	7	6.4267	21388	2	Q99878;Q96KK5;Q71UI9;P0C0S5;Q9BTM1;Q16777;Q93077;Q8IUE6;Q7L7L0;Q6FI13;P20671;P0C0S8;P04908;Q96QV6;P16104	Histone H2A type 1-J;Histone H2A type 1-H;Histone H2A.V;Histone H2A.Z;Histone H2A.J;Histone H2A type 2-C;Histone H2A type 1-C;Histone H2A type 2-B;Histone H2A type 3;Histone H2A type 2-A;Histone H2A type 1-D;Histone H2A type 1;Histone H2A type 1-B/E;Histone H2A type 1-A;Histone H2AX	HIST1H2AJ;HIST1H2AH;H2AFV;H2AFZ;H2AFJ;HIST2H2AC;HIST1H2AC;HIST2H2AB;HIST3H2A;HIST2H2AA3;HIST1H2AD;HIST1H2AG;HIST1H2AB;HIST1H2AA;H2AFX
11.5088	4	4	25.9	33.641	87032	5	P04792	Heat shock protein beta-1	HSPB1
8.01089	3	2	14.9	16.047	23236	2	P04406	Glyceraldehyde-3-phosphate dehydrogenase	GAPDH
9.99915	1	1	3.4	8.3851	13119	1	Q3ZCM7;P04350;P68371	Tubulin beta-8 chain;Tubulin beta-4A chain;Tubulin beta-4B chain	TUBB8;TUBB4A;TUBB4B
9.02486	21	1	36.7	6.3027	6677.8	1	P04259	Keratin, type II cytoskeletal 6B	KRT6B
8.81609	1	1	3.8	5.9641	15913	2	P04075	Fructose-bisphosphate aldolase A	ALDOA
10.1785	4	4	5.6	24.532	21559	4	P02545	Prelamin-A/C;Lamin-A/C	LMNA
12.0078	3	3	13	32.349	68061	4	P01857	Ig gamma-1 chain C region	IGHG1
5.7232	1	1	17	9.4896	656.64	1	P01834	Ig kappa chain C region	IGKC
9.74374	1	1	11.9	6.7225	10991	1	Q99880;Q99879;Q99877;Q93079;Q8N257;Q5QNW6;Q16778;P62807;P58876;P57053;P33778;P23527;P06899;O60814	Histone H2B type 1-L;Histone H2B type 1-M;Histone H2B type 1-N;Histone H2B type 1-H;Histone H2B type 3-B;Histone H2B type 2-F;Histone H2B type 2-E;Histone H2B type 1-C/E/F/G/I;Histone H2B type 1-D;Histone H2B type F-S;Histone H2B type 1-B;Histone H2B type 1-O;Histone H2B type 1-J;Histone H2B type 1-K	HIST1H2BL;HIST1H2BM;HIST1H2BN;HIST1H2BH;HIST3H2BB;HIST2H2BF;HIST2H2BE;HIST1H2BC;HIST1H2BD;H2BFS;HIST1H2BB;HIST1H2BO;HIST1H2BJ;HIST1H2BK

## Sheet: GO for R0
Processes
#term ID	term description	log2(FDR)	false discovery rate	matching proteins in your network (labels)
GO:0043312	neutrophil degranulation	33.797	6.7e-11	ALDOA,ANXA2,CALML5,DSG1,DSP,FABP5,HSP90AB1,HSPA6,JUP,PKM,PKP1,PPIA,PRSS3,S100A8,S100A9,SERPINB3,TUBB
GO:0006996	organelle organization	32.7546	1.38e-10	ACTG1,ALDOA,ANXA2,CHD3,DSP,EPPK1,GAPDH,HIST1H1B,HIST1H2AJ,HIST1H2BL,HIST1H4F,HIST2H3D,HSP90AB1,IDE,JUP,KIF23,KRT6B,LMNA,MIS12,OCRL,PKP1,POF1B,PPIA,S100A9,SFN,TUBA1C,TUBA4A,TUBB,TUBB8,TYMP,UBA52,VIM,YWHAZ
GO:0045055	regulated exocytosis	32.7546	1.38e-10	ALDOA,ANXA2,CALML5,DSG1,DSP,FABP5,HSP90AB1,HSPA6,JUP,PKM,PKP1,PPIA,PRSS3,S100A8,S100A9,SERPINB3,TUBA4A,TUBB
GO:0032940	secretion by cell	29.0021	1.86e-09	ALDOA,ANXA2,CALML5,DSG1,DSP,FABP5,HSP90AB1,HSPA6,IL1RN,JUP,PKM,PKP1,PPIA,PRSS3,S100A8,S100A9,SERPINB3,TUBA4A,TUBB
GO:0002252	immune effector process	26.6434	9.54e-09	ACTG1,ALDOA,ANXA2,CALML5,DSG1,DSP,FABP5,HSP90AB1,HSPA6,JUP,PKM,PKP1,PPIA,PRSS3,S100A8,S100A9,SERPINB3,TUBB
GO:0007010	cytoskeleton organization	26.164	1.33e-08	ACTG1,ALDOA,CHD3,DSP,EPPK1,GAPDH,JUP,KIF23,KRT6B,LMNA,PKP1,POF1B,S100A9,TUBA1C,TUBA4A,TUBB,TUBB8,VIM
GO:0016043	cellular component organization	25.3305	2.37e-08	ACTG1,ALDOA,ANXA2,CHD3,DSG1,DSP,EPPK1,GAPDH,HIST1H1B,HIST1H2AJ,HIST1H2BL,HIST1H4F,HIST2H3D,HSP90AB1,IDE,JUP,KCNG2,KIF23,KRT6B,LMNA,MIS12,OCRL,PKM,PKP1,POF1B,PPIA,S100A9,SFN,TGM1,TGM3,TUBA1C,TUBA4A,TUBB,TUBB8,TYMP,UBA52,VIM,YWHAZ
GO:0001775	cell activation	24.6647	3.76e-08	ALDOA,ANXA2,CALML5,DSG1,DSP,FABP5,HSP90AB1,HSPA6,JUP,PKM,PKP1,PPIA,PRSS3,S100A8,S100A9,SERPINB3,TUBB,YWHAZ
GO:0016192	vesicle-mediated transport	23.8661	6.54e-08	ACTG1,ALDOA,ANXA2,CALML5,DSG1,DSP,FABP5,HSP90AB1,HSPA6,JUP,KIF23,PKM,PKP1,PPIA,PRSS3,RAB6B,S100A8,S100A9,SERPINB3,TUBA4A,TUBB,UBA52
GO:0006955	immune response	23.4281	8.86e-08	ACTG1,ALDOA,ANXA2,CALML5,DSG1,DSP,FABP5,GAPDH,HSP90AB1,HSPA6,IL1RN,JUP,PKM,PKP1,PPIA,PRSS3,S100A8,S100A9,SERPINB3,TUBB,VIM
GO:0022607	cellular component assembly	20.2571	7.98e-07	ACTG1,ALDOA,ANXA2,DSG1,HIST1H1B,HIST1H2BL,HIST1H4F,HIST2H3D,HSP90AB1,IDE,JUP,KCNG2,KIF23,MIS12,OCRL,PKM,PKP1,POF1B,TGM3,TUBA4A,TUBB,TUBB8,UBA52,YWHAZ
GO:0051234	establishment of localization	19.6566	1.21e-06	ACTG1,ALDOA,ANXA2,CALML5,DSG1,DSP,FABP5,HIST1H1B,HSP90AB1,HSPA6,HSPB1,IDE,IL1RN,JUP,KCNG2,KIF23,LMNA,MIS12,PKM,PKP1,PPIA,PRSS3,RAB6B,S100A8,S100A9,SERPINB3,SFN,TUBA1C,TUBA4A,TUBB,UBA52,YWHAZ
GO:0031424	keratinization	19.318	1.53e-06	CASP14,DSG1,DSP,JUP,KRT6B,PKP1,SFN,TGM1,TGM3
GO:0008544	epidermis development	19.2445	1.61e-06	CALML5,CASP14,DSG1,DSP,FABP5,JUP,KRT6B,PKP1,SFN,TGM1,TGM3
GO:0070268	cornification	18.2356	3.24e-06	CASP14,DSG1,DSP,JUP,KRT6B,PKP1,TGM1
GO:0002376	immune system process	17.8646	4.19e-06	ACTG1,ALDOA,ANXA2,CALML5,DSG1,DSP,FABP5,GAPDH,HSP90AB1,HSPA6,IL1RN,JUP,KIF23,PKM,PKP1,PPIA,PRSS3,S100A8,S100A9,SERPINB3,TUBB,UBA52,VIM
GO:0006810	transport	16.6867	9.48e-06	ACTG1,ALDOA,ANXA2,CALML5,DSG1,DSP,FABP5,HSP90AB1,HSPA6,HSPB1,IDE,IL1RN,JUP,KCNG2,KIF23,LMNA,PKM,PKP1,PPIA,PRSS3,RAB6B,S100A8,S100A9,SERPINB3,SFN,TUBA1C,TUBA4A,TUBB,UBA52,YWHAZ
GO:0045109	intermediate filament organization	14.3648	4.74e-05	DSP,EPPK1,PKP1,VIM
GO:0006735	NADH regeneration	13.7437	7.29e-05	ALDOA,ENO1,GAPDH,PKM
GO:0061621	canonical glycolysis	13.7437	7.29e-05	ALDOA,ENO1,GAPDH,PKM
GO:0061718	glucose catabolic process to pyruvate	13.7437	7.29e-05	ALDOA,ENO1,GAPDH,PKM
GO:0097435	supramolecular fiber organization	13.6536	7.76e-05	ACTG1,ALDOA,ANXA2,DSP,EPPK1,HSP90AB1,PKP1,POF1B,VIM
GO:0018119	peptidyl-cysteine S-nitrosylation	13.5723	8.21e-05	GAPDH,S100A8,S100A9
GO:0030855	epithelial cell differentiation	13.2877	0.0001	CASP14,DSG1,DSP,JUP,KRT6B,PKP1,POF1B,SFN,TGM1,TGM3,VIM
GO:0006757	ATP generation from ADP	11.8548	0.00027	ALDOA,ENO1,GAPDH,PKM
GO:0012501	programmed cell death	11.8023	0.00028	CASP14,DSG1,DSP,GAPDH,JUP,KRT6B,LGALS7B,PKM,PKP1,S100A8,S100A9,SFN,TGM1
GO:0051262	protein tetramerization	11.8023	0.00028	ALDOA,ANXA2,HIST1H4F,IDE,PKM,TGM3
GO:0042866	pyruvate biosynthetic process	11.6096	0.00032	ALDOA,ENO1,GAPDH,PKM
GO:0009435	NAD biosynthetic process	10.6789	0.00061	ALDOA,ENO1,GAPDH,PKM
GO:0006006	glucose metabolic process	10.4397	0.00072	ALDOA,ENO1,FABP5,GAPDH,PKM
Pathways
HSA-6798695	Neutrophil degranulation	36.1516	1.31e-11	ALDOA,ANXA2,CALML5,DSG1,DSP,FABP5,HSP90AB1,HSPA6,JUP,PKM,PKP1,PPIA,PRSS3,S100A8,S100A9,SERPINB3,TUBB
HSA-168256	Immune System	29.6105	1.22e-09	ACTG1,ALDOA,ANXA2,CALML5,DSG1,DSP,FABP5,HSP90AB1,HSPA6,IL1RN,JUP,KIF23,PKM,PKP1,PPIA,PRSS3,S100A8,S100A9,SERPINB3,TUBA1C,TUBA4A,TUBB,TUBB8,UBA52,VIM,YWHAZ
HSA-168249	Innate Immune System	26.96	7.66e-09	ACTG1,ALDOA,ANXA2,CALML5,DSG1,DSP,FABP5,HSP90AB1,HSPA6,JUP,PKM,PKP1,PPIA,PRSS3,S100A8,S100A9,SERPINB3,TUBB,UBA52
HSA-109581	Apoptosis	17.7584	4.51e-06	DSG1,DSP,HIST1H1B,PKP1,SFN,UBA52,VIM,YWHAZ
HSA-1445148	Translocation of SLC2A4 (GLUT4) to the plasma membrane	16.9923	7.67e-06	ACTG1,SFN,TUBA1C,TUBA4A,TUBB8,YWHAZ
HSA-1640170	Cell Cycle	16.6974	9.41e-06	HIST1H2AJ,HIST1H2BL,HSP90AB1,KIF23,MIS12,SFN,TUBA1C,TUBA4A,TUBB,TUBB8,UBA52,YWHAZ
HSA-195258	RHO GTPase Effectors	16.6974	9.41e-06	ACTG1,HIST1H2AJ,HIST1H2BL,MIS12,SFN,TUBA1C,TUBA4A,TUBB8,YWHAZ
HSA-6809371	Formation of the cornified envelope	16.6974	9.41e-06	CASP14,DSG1,DSP,JUP,KRT6B,PKP1,TGM1
HSA-1266738	Developmental Biology	16.5811	1.02e-05	ACTG1,CASP14,DSG1,DSP,HIST1H2AJ,HIST1H2BL,HSP90AB1,JUP,KRT6B,PKP1,TGM1,TUBA1C,TUBA4A,TUBB8,UBA52
HSA-2262752	Cellular responses to stress	16.5811	1.02e-05	HIST1H1B,HIST1H2AJ,HIST1H2BL,HSP90AB1,HSPA6,PRDX2,TUBA1C,TUBA4A,TUBB8,UBA52
HSA-194315	Signaling by Rho GTPases	16.2311	1.3e-05	ACTG1,HIST1H2AJ,HIST1H2BL,MIS12,OCRL,SFN,TUBA1C,TUBA4A,TUBB8,YWHAZ
HSA-75153	Apoptotic execution phase	15.2091	2.64e-05	DSG1,DSP,HIST1H1B,PKP1,VIM
HSA-68886	M Phase	15.0056	3.04e-05	HIST1H2AJ,HIST1H2BL,KIF23,MIS12,TUBA1C,TUBA4A,TUBB,TUBB8,UBA52
HSA-69278	Cell Cycle, Mitotic	14.2935	4.98e-05	HIST1H2AJ,HIST1H2BL,HSP90AB1,KIF23,MIS12,TUBA1C,TUBA4A,TUBB,TUBB8,UBA52
HSA-5626467	RHO GTPases activate IQGAPs	13.5358	8.42e-05	ACTG1,TUBA1C,TUBA4A,TUBB8
HSA-8852276	The role of GTSE1 in G2/M progression after G2 checkpoint	13.2877	0.0001	HSP90AB1,TUBA1C,TUBA4A,TUBB8,UBA52
HSA-111465	Apoptotic cleavage of cellular proteins	12.5222	0.00017	DSG1,DSP,PKP1,VIM
HSA-351906	Apoptotic cleavage of cell adhesion proteins	12.0861	0.00023	DSG1,DSP,PKP1
HSA-199991	Membrane Trafficking	11.8023	0.00028	ACTG1,KIF23,OCRL,RAB6B,SFN,TUBA1C,TUBA4A,TUBB8,UBA52,YWHAZ
HSA-437239	Recycling pathway of L1	11.6554	0.00031	ACTG1,TUBA1C,TUBA4A,TUBB8
HSA-190828	Gap junction trafficking	11.6096	0.00032	ACTG1,TUBA1C,TUBA4A,TUBB8
HSA-6811436	COPI-independent Golgi-to-ER retrograde traffic	11.3617	0.00038	RAB6B,TUBA1C,TUBA4A,TUBB8
HSA-69275	G2/M Transition	11.1502	0.00044	HSP90AB1,TUBA1C,TUBA4A,TUBB,TUBB8,UBA52
HSA-3371497	HSP90 chaperone cycle for steroid hormone receptors (SHR)	11.1178	0.00045	HSP90AB1,TUBA1C,TUBA4A,TUBB8
HSA-190840	Microtubule-dependent trafficking of connexons from Golgi to the plasma membrane	11.0247	0.00048	TUBA1C,TUBA4A,TUBB8
HSA-983189	Kinesins	10.8023	0.00056	KIF23,TUBA1C,TUBA4A,TUBB8
HSA-5625740	RHO GTPases activate PKNs	10.4198	0.00073	HIST1H2AJ,HIST1H2BL,SFN,YWHAZ
HSA-8856688	Golgi-to-ER retrograde transport	10.4198	0.00073	KIF23,RAB6B,TUBA1C,TUBA4A,TUBB8
HSA-5663220	RHO GTPases Activate Formins	10.3808	0.00075	ACTG1,MIS12,TUBA1C,TUBA4A,TUBB8
HSA-70263	Gluconeogenesis	8.70275	0.0024	ALDOA,ENO1,GAPDH
KEGG
hsa05130	Pathogenic Escherichia coli infection	18.8819	2.07e-06	ACTG1,TUBA1C,TUBA4A,TUBB,TUBB8,YWHAZ
hsa00010	Glycolysis / Gluconeogenesis	8.28771	0.0032	ALDOA,ENO1,GAPDH,PKM
hsa01230	Biosynthesis of amino acids	8.28771	0.0032	ALDOA,ENO1,GAPDH,PKM
hsa04145	Phagosome	8.28771	0.0032	ACTG1,TUBA1C,TUBA4A,TUBB,TUBB8
hsa04540	Gap junction	8.28771	0.0032	TUBA1C,TUBA4A,TUBB,TUBB8
hsa05412	Arrhythmogenic right ventricular cardiomyopathy (ARVC)	8.28771	0.0032	ACTG1,DSP,JUP,LMNA
hsa01200	Carbon metabolism	7.24332	0.0066	ALDOA,ENO1,GAPDH,PKM
hsa04210	Apoptosis	6.71786	0.0095	ACTG1,LMNA,TUBA1C,TUBA4A
hsa04915	Estrogen signaling pathway	6.71786	0.0095	CALML3,CALML5,HSP90AB1,HSPA6
hsa05034	Alcoholism	6.71786	0.0095	CALML3,CALML5,HIST1H2AJ,HIST1H2BL
hsa05418	Fluid shear stress and atherosclerosis	6.71786	0.0095	ACTG1,CALML3,CALML5,HSP90AB1
hsa05010	Alzheimer's disease	6.07826	0.0148	CALML3,CALML5,GAPDH,IDE
hsa04066	HIF-1 signaling pathway	5.46116	0.0227	ALDOA,ENO1,GAPDH
hsa04070	Phosphatidylinositol signaling system	5.46116	0.0227	CALML3,CALML5,OCRL
hsa04657	IL-17 signaling pathway	5.46116	0.0227	HSP90AB1,S100A8,S100A9
hsa04744	Phototransduction	5.46116	0.0227	CALML3,CALML5
hsa04922	Glucagon signaling pathway	5.46116	0.0227	CALML3,CALML5,PKM
hsa05146	Amoebiasis	5.46116	0.0227	HSPB1,SERPINB3,SERPINB4
hsa05169	Epstein-Barr virus infection	5.46116	0.0227	HSPA6,HSPB1,VIM,YWHAZ
hsa04114	Oocyte meiosis	5.14305	0.0283	CALML3,CALML5,YWHAZ

## Sheet: Keratins
Majority protein IDs	Protein names	Gene names	background	1 day after landing	7 day after landing	Peptides	MS/MS count	T-test p-value	T-test Difference
P04264	Keratin, type II cytoskeletal 1	KRT1	17.6 + 1.5	18.4 + 0.3	17.8 + 0.6	34	309	0.224582	0.849836
P35527	Keratin, type I cytoskeletal 9	KRT9	17 + 0	15.6 + 1.2	16.5 + 0.2	16	114	0.0153196	-1.34933
P13645	Keratin, type I cytoskeletal 10	KRT10	16.2 + 1.4	18.2 + 0.4	16.1 + 1.3	30	238	0.0676377	1.98576
P35908	Keratin, type II cytoskeletal 2 epidermal	KRT2	16 + 0.2	17 + 0.4	15.4 + 0.9	29	184	0.00013337	0.998175
P02533	Keratin, type I cytoskeletal 14	KRT14	15.4 + 0.1	15.1 + 1.4	14.5 + 0.1	23	76	0.69976	-0.230052
P13647	Keratin, type II cytoskeletal 5	KRT5	14.1 + 0.2	13.8 + 1.1	13.6 + 0.3	24	58	0.450048	-0.392086
P02538;P48668	Keratin, type II cytoskeletal 6A;Keratin, type II cytoskeletal 6C	KRT6A;KRT6C	14.1 + 0.1	14.5 + 1.5	13.1 + 0	25	66	0.563815	0.369161
P08779	Keratin, type I cytoskeletal 16	KRT16	14 + 0	15.4 + 0.6	NaN	22	28	1	1.42591
P13646	Keratin, type I cytoskeletal 13	KRT13	NaN	13.2 + 0	NaN	7	3	1	0
P08727	Keratin, type I cytoskeletal 19	KRT19	NaN	11.4 + 0	NaN	11	4	1	0
Q15323	Keratin, type I cuticular Ha1	KRT31	NaN	15.9 + 0	NaN	6	2	1	0
Q14532	Keratin, type I cuticular Ha2	KRT32	NaN	11 + 0	NaN	6	2	1	0
Q14525	Keratin, type I cuticular Ha3-II;Keratin, type I cuticular Ha3-I	KRT33B;KRT33A	NaN	15.7 + 0	NaN	7	10	1	0
Q92764	Keratin, type I cuticular Ha5	KRT35	NaN	11.5 + 0	NaN	5	1	1	0
O76013	Keratin, type I cuticular Ha6	KRT36	NaN	12.4 + 0	NaN	4	2	1	0
P04259	Keratin, type II cytoskeletal 6B	KRT6B	NaN	9 + 0	NaN	21	1	1	0
Q14CN4	Keratin, type II cytoskeletal 72	KRT72	NaN	9.7 + 0	NaN	5	8	1	0
O95678	Keratin, type II cytoskeletal 75	KRT75	NaN	13.8 + 0	NaN	9	1	1	0
Q8N1N4	Keratin, type II cytoskeletal 78	KRT78	NaN	8 + 0	NaN	2	1	1	0
P05787	Keratin, type II cytoskeletal 8	KRT8	NaN	11.1 + 0	NaN	5	4	1	0
Q9NSB4	Keratin, type II cuticular Hb2	KRT82	NaN	14 + 0	NaN	3	2	1	0
P78385;O43790;A6NCN2;Q14533	Keratin, type II cuticular Hb3;Keratin, type II cuticular Hb6;Putative keratin-87 protein;Keratin, type II cuticular Hb1	KRT83;KRT86;KRT87P;KRT81	NaN	16.8 + 0.2	NaN	11	13	1	0
P78386	Keratin, type II cuticular Hb5	KRT85	NaN	10.9 + 0	NaN	8	1	1	0
